# Supplementary material
Source: PubMed Central journal article supplement (PMC11470305)
Supplement: ajtr0016-5137-f3.pdf [file ajtr0016-5137-f3.pdf]

The association between vitamin C and depressive risk

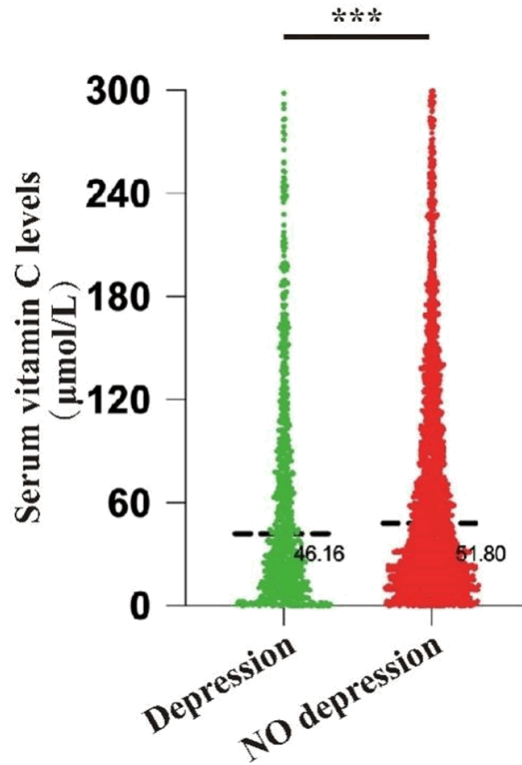

**Supplementary Figure 1.** Comparison between serum vitamin C levels with depression and without depression. \*\*\*: Significance between the two groups  $P < 0.001$ .

**Supplementary Table 1.** Association between vitamin C intake and depressive risk

|       | Crude OR         | Model 1          | Model 2          | Model 3          | Model 4          |
|-------|------------------|------------------|------------------|------------------|------------------|
| Total | 1.21 (1.03-1.41) | 1.24 (1.06-1.45) | 1.13 (0.96-1.33) | 1.03 (0.88-1.22) | 1.03 (0.87-1.21) |

Figures are expressed as odds ratio (95% confidence interval). Model 1: Adjusted for gender, race and age. Model 2: Further adjusted for socioeconomic factors including education level, marital status and ratio of family income to poverty (PIR). Model 3: Further adjusted for drinking status, ever cigarette smoking and BMI. Model 4: Further adjusted for diabetes and hypertension.

## The association between vitamin C and depressive risk

**Supplementary Table 2.** Bidirectional causal association between vitamin C intake as supplement or medication and depressive risk estimated by MR

| Exposure/Outcome                       | nSNP | IVW                     |       | MR Egger                   |       | Weighted median          |       | Weighted mode             |       | Simple mode               |       | Heterogeneity p |          | Pleiotropy P |
|----------------------------------------|------|-------------------------|-------|----------------------------|-------|--------------------------|-------|---------------------------|-------|---------------------------|-------|-----------------|----------|--------------|
|                                        |      | OR (95% CI)             | P     | OR (95% CI)                | P     | OR (95% CI)              | P     | OR (95% CI)               | P     | OR (95% CI)               | P     | IVW             | MR Egger |              |
| Vitamin C supplements/Depression       | 23   | 2.42<br>(0.47-12.48)    | 0.292 | 3.39 (0.06-5.09)           | 0.558 | 1.57 (0.16-15.54)        | 0.702 | 1.71<br>(0.04-70.39)      | 0.781 | 1.71<br>(0.04-68.45)      | 0.779 | 0.898           | 0.866    | 0.858        |
| Treatment vitamin C product/Depression | 8    | 189.48<br>(0.13-284.22) | 0.159 | 8596.92<br>(0.00-12895.38) | 0.682 | 785.00<br>(0.05-1177.50) | 0.175 | 4825.64<br>(0.00-7238.45) | 0.301 | 2911.66<br>(0.00-4367.49) | 0.356 | 0.385           | 0.286    | 0.86         |

Abbreviations: IVW, inverse-variance weighted; MR, Mendelian randomization; SNP, Single nucleotide polymorphisms.

**Supplementary Table 3.** Detailed information of selected SNPs for MR analysis of the causal association between serum levels, intake as supplement or medication and depression

| Exposure                                   | Outcome    | GWAS ID of exposure | GWAS ID of outcome  | Sample size | SNP         | $\beta$    | se         | P        |
|--------------------------------------------|------------|---------------------|---------------------|-------------|-------------|------------|------------|----------|
| Vitamin C                                  | Depression | ukb-b-19390         | finn-b-F5_DEPRESSIO | 64979       | rs9540734   | -0.0259285 | 0.00548469 | 2.30E-06 |
| Vitamin C                                  | Depression | ukb-b-19390         | finn-b-F5_DEPRESSIO | 64979       | rs7626478   | 0.0279796  | 0.00610134 | 4.50E-06 |
| Vitamin C                                  | Depression | ukb-b-19390         | finn-b-F5_DEPRESSIO | 64979       | rs74978963  | 0.150814   | 0.0310213  | 1.20E-06 |
| Vitamin C                                  | Depression | ukb-b-19390         | finn-b-F5_DEPRESSIO | 64979       | rs61868302  | -0.0571013 | 0.0118391  | 1.40E-06 |
| Vitamin C                                  | Depression | ukb-b-19390         | finn-b-F5_DEPRESSIO | 64979       | rs4481190   | -0.0306375 | 0.00574377 | 9.60E-08 |
| Vitamin C                                  | Depression | ukb-b-19390         | finn-b-F5_DEPRESSIO | 64979       | rs4238567   | 0.0253068  | 0.00550812 | 4.30E-06 |
| Vitamin C                                  | Depression | ukb-b-19390         | finn-b-F5_DEPRESSIO | 64979       | rs2018201   | -0.0808079 | 0.0171646  | 2.50E-06 |
| Vitamin C                                  | Depression | ukb-b-19390         | finn-b-F5_DEPRESSIO | 64979       | rs1883993   | 0.044959   | 0.00935324 | 1.50E-06 |
| Vitamin C                                  | Depression | ukb-b-19390         | finn-b-F5_DEPRESSIO | 64979       | rs17482258  | 0.042829   | 0.00926045 | 3.70E-06 |
| Vitamin C                                  | Depression | ukb-b-19390         | finn-b-F5_DEPRESSIO | 64979       | rs11650824  | 0.0794787  | 0.0158822  | 5.60E-07 |
| Vitamin C                                  | Depression | ukb-b-19390         | finn-b-F5_DEPRESSIO | 64979       | rs114598078 | 0.0655782  | 0.0137636  | 1.90E-06 |
| Vitamin and mineral supplements: Vitamin C | Depression | ukb-b-15175         | finn-b-F5_DEPRESSIO | 460351      | rs904017    | 0.0032693  | 0.00064653 | 4.30E-07 |
| Vitamin and mineral supplements: Vitamin C | Depression | ukb-b-15175         | finn-b-F5_DEPRESSIO | 460351      | rs8063219   | -0.0029635 | 0.00060466 | 9.50E-07 |
| Vitamin and mineral supplements: Vitamin C | Depression | ukb-b-15175         | finn-b-F5_DEPRESSIO | 460351      | rs79016212  | 0.0101431  | 0.00217178 | 3.00E-06 |
| Vitamin and mineral supplements: Vitamin C | Depression | ukb-b-15175         | finn-b-F5_DEPRESSIO | 460351      | rs78684519  | -0.0076822 | 0.00167051 | 4.30E-06 |
| Vitamin and mineral supplements: Vitamin C | Depression | ukb-b-15175         | finn-b-F5_DEPRESSIO | 460351      | rs74797698  | 0.00800637 | 0.00171495 | 3.00E-06 |
| Vitamin and mineral supplements: Vitamin C | Depression | ukb-b-15175         | finn-b-F5_DEPRESSIO | 460351      | rs74634742  | 0.00642704 | 0.00138683 | 3.60E-06 |
| Vitamin and mineral supplements: Vitamin C | Depression | ukb-b-15175         | finn-b-F5_DEPRESSIO | 460351      | rs72993633  | 0.00661841 | 0.0013443  | 8.50E-07 |
| Vitamin and mineral supplements: Vitamin C | Depression | ukb-b-15175         | finn-b-F5_DEPRESSIO | 460351      | rs72662628  | 0.0112041  | 0.00244331 | 4.50E-06 |
| Vitamin and mineral supplements: Vitamin C | Depression | ukb-b-15175         | finn-b-F5_DEPRESSIO | 460351      | rs6796394   | 0.00329826 | 0.00071574 | 4.10E-06 |
| Vitamin and mineral supplements: Vitamin C | Depression | ukb-b-15175         | finn-b-F5_DEPRESSIO | 460351      | rs67914003  | -0.0065778 | 0.00135111 | 1.10E-06 |
| Vitamin and mineral supplements: Vitamin C | Depression | ukb-b-15175         | finn-b-F5_DEPRESSIO | 460351      | rs62144051  | -0.0047476 | 0.00102246 | 3.40E-06 |
| Vitamin and mineral supplements: Vitamin C | Depression | ukb-b-15175         | finn-b-F5_DEPRESSIO | 460351      | rs59538793  | 0.0030913  | 0.0006426  | 1.50E-06 |
| Vitamin and mineral supplements: Vitamin C | Depression | ukb-b-15175         | finn-b-F5_DEPRESSIO | 460351      | rs4795397   | -0.0032106 | 0.00058687 | 4.50E-08 |

## The association between vitamin C and depressive risk

|                                              |            |             |                     |        |             |            |            |          |
|----------------------------------------------|------------|-------------|---------------------|--------|-------------|------------|------------|----------|
| Vitamin and mineral supplements: Vitamin C   | Depression | ukb-b-15175 | finn-b-F5_DEPRESSIO | 460351 | rs35751866  | 0.00320121 | 0.00068285 | 2.80E-06 |
| Vitamin and mineral supplements: Vitamin C   | Depression | ukb-b-15175 | finn-b-F5_DEPRESSIO | 460351 | rs307119    | -0.0028932 | 0.00060273 | 1.60E-06 |
| Vitamin and mineral supplements: Vitamin C   | Depression | ukb-b-15175 | finn-b-F5_DEPRESSIO | 460351 | rs2523735   | -0.004176  | 0.00082378 | 4.00E-07 |
| Vitamin and mineral supplements: Vitamin C   | Depression | ukb-b-15175 | finn-b-F5_DEPRESSIO | 460351 | rs185845702 | -0.0140867 | 0.00302992 | 3.30E-06 |
| Vitamin and mineral supplements: Vitamin C   | Depression | ukb-b-15175 | finn-b-F5_DEPRESSIO | 460351 | rs12960708  | -0.0034192 | 0.00068912 | 7.00E-07 |
| Vitamin and mineral supplements: Vitamin C   | Depression | ukb-b-15175 | finn-b-F5_DEPRESSIO | 460351 | rs12535840  | -0.002778  | 0.00059741 | 3.30E-06 |
| Vitamin and mineral supplements: Vitamin C   | Depression | ukb-b-15175 | finn-b-F5_DEPRESSIO | 460351 | rs117654917 | 0.0118145  | 0.00255892 | 3.90E-06 |
| Vitamin and mineral supplements: Vitamin C   | Depression | ukb-b-15175 | finn-b-F5_DEPRESSIO | 460351 | rs11636071  | 0.00303318 | 0.00065744 | 4.00E-06 |
| Vitamin and mineral supplements: Vitamin C   | Depression | ukb-b-15175 | finn-b-F5_DEPRESSIO | 460351 | rs116025296 | 0.0117469  | 0.00249333 | 2.50E-06 |
| Vitamin and mineral supplements: Vitamin C   | Depression | ukb-b-15175 | finn-b-F5_DEPRESSIO | 460351 | rs113962806 | 0.00701094 | 0.00151217 | 3.50E-06 |
| Vitamin and mineral supplements: Vitamin C   | Depression | ukb-b-15175 | finn-b-F5_DEPRESSIO | 460351 | rs10910087  | 0.00299287 | 0.00065161 | 4.40E-06 |
| Vitamin and mineral supplements: Vitamin C   | Depression | ukb-b-15175 | finn-b-F5_DEPRESSIO | 460351 | rs10000324  | -0.0028352 | 0.00059545 | 1.90E-06 |
| Treatment/medication code: vitamin c product | Depression | ukb-b-488   | finn-b-F5_DEPRESSIO | 462933 | rs76905249  | 0.00219608 | 0.00043622 | 4.80E-07 |
| Treatment/medication code: vitamin c product | Depression | ukb-b-488   | finn-b-F5_DEPRESSIO | 462933 | rs7550128   | 0.00181212 | 0.00035462 | 3.20E-07 |
| Treatment/medication code: vitamin c product | Depression | ukb-b-488   | finn-b-F5_DEPRESSIO | 462933 | rs62364984  | 0.00153669 | 0.00032936 | 3.10E-06 |
| Treatment/medication code: vitamin c product | Depression | ukb-b-488   | finn-b-F5_DEPRESSIO | 462933 | rs55710406  | 0.00120477 | 0.0002377  | 4.00E-07 |
| Treatment/medication code: vitamin c product | Depression | ukb-b-488   | finn-b-F5_DEPRESSIO | 462933 | rs35090764  | 0.00114641 | 0.00023581 | 1.20E-06 |
| Treatment/medication code: vitamin c product | Depression | ukb-b-488   | finn-b-F5_DEPRESSIO | 462933 | rs1947446   | 0.00120413 | 0.00026136 | 4.10E-06 |
| Treatment/medication code: vitamin c product | Depression | ukb-b-488   | finn-b-F5_DEPRESSIO | 462933 | rs17836475  | -0.0013695 | 0.00028479 | 1.50E-06 |
| Treatment/medication code: vitamin c product | Depression | ukb-b-488   | finn-b-F5_DEPRESSIO | 462933 | rs12205050  | 0.00155101 | 0.00031525 | 8.70E-07 |

## The association between vitamin C and depressive risk

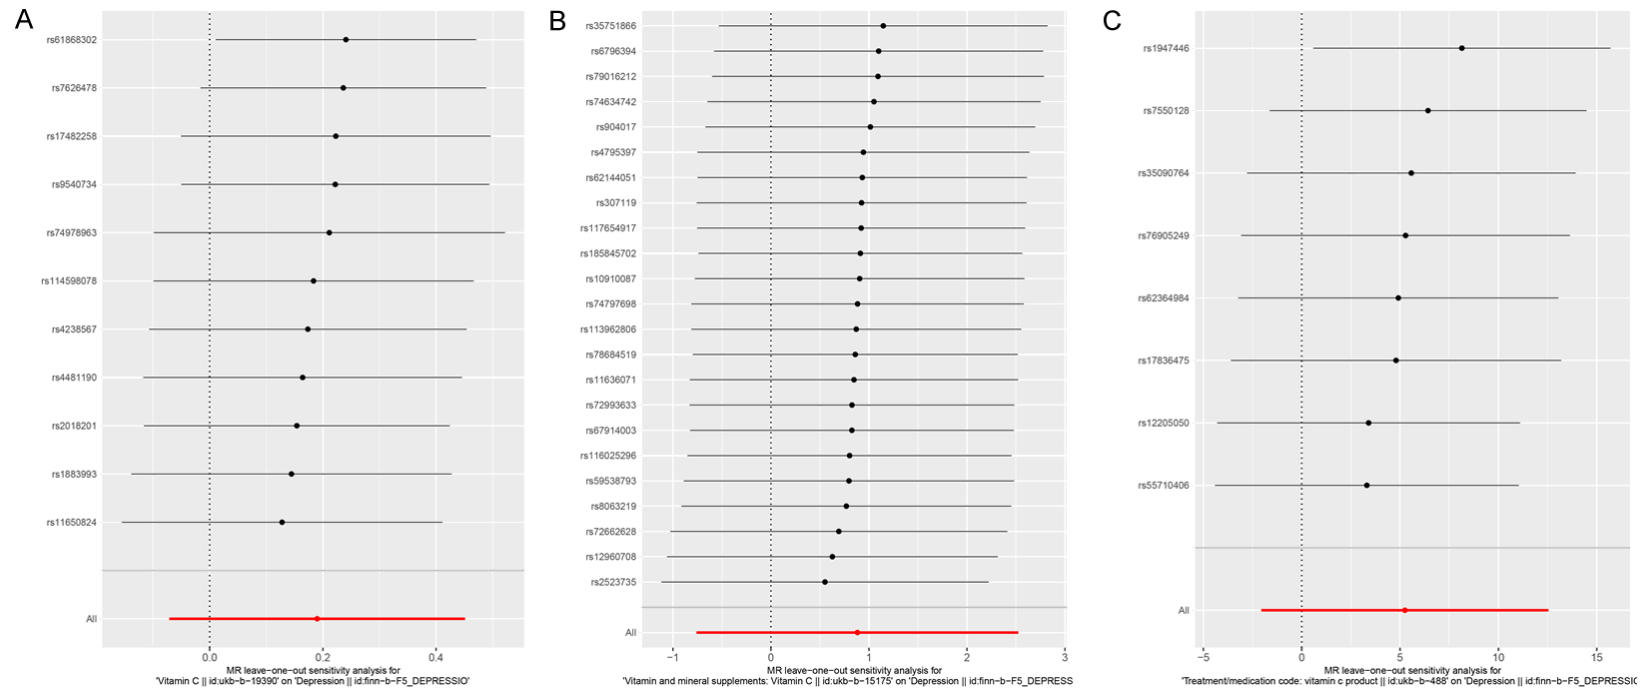

**Supplementary Figure 2.** Leave-one-out sensitivity analysis of individual genetic variation in these all examinations. A: Serum vitamin C levels on depressive risk; B: Supplement vitamin C on depressive risk; C: Medication vitamin C on depressive risk.
